# Supplementary material for: Fabrication of Fluorescent PMMA-Carbon Nanodots Optical Films and their Feasibility in Improving Solar Cells Efficiency using Low-Cost Sustainable Materials
Source: Research Square preprint supplement (doi:10.21203/rs.3.rs-3192869/v1), 2023-07-31
Supplement: Supplementary file 1 [file 2ecd9803b9b9b78b55bab202.docx]

Fabrication of Fluorescent PMMA-Carbon Nanodots Optical Films and their Feasibility in Improving Solar Cells Efficiency using Low-Cost Sustainable Materials

Marco C. P. Soares1,*,+, Michele Cacioppo2,†,*,+, Francesco Amato2,‡,*,+, Thiago D. Cabral1, Marcelo N. P. Carreño3, Inés Pereyra3, Carlos A. S. Ramos3, Manuel Cid3, Gilson S. Goveia4, José F. D. Chubaci4, Eric Fujiwara1, Maurizio Prato2,5,6, Julio R. Bartoli1,7,*

*1Laboratory of Photonic Materials and Devices, School of Mechanical Engineering, University of Campinas, Campinas, SP, Brazil*

*2Carbon Nanotechnology Group, Department of Chemical and Pharmaceutical Sciences, University of Trieste, Trieste, Italy*

*3**Laboratory of Microelectronics,* *Polytechnic School,* *University of São Paulo, SP, Brazil (LME/EPUSP)*

*4**Institute of Physics, University of São Paulo, SP, Brazil*

*5Center for Cooperative Research in Biomaterials (CIC biomaGUNE),* *Basque Research and Technology Alliance (BRTA),* *Paseo de Miramón 182, 20014, Donostia San Sebastián (Spain)*

*6Basque Foundation for Science,* *Ikerbasque,* *48013 Bilbao, Spain*

*7School of Chemical Engineering,* *University of Campinas, Campinas, SP, Brazil*

†*Present address: Department of Biological, Chemical and Pharmaceutical Sciences and Technologies (STEBICEF), University of Palermo, Viale delle Scienze Ed. 17, 90128 Palermo, Italy*

‡*Present Address:* *Department of Chemistry, University of Rome “La Sapienza”, Rome, Italy*

**Corresponding authors: marcosoares.feq@gmail.com (M.C.P.S);* *michelecacioppo@gmail.com (M.C.); amatofrancesco89@libero.it (F.A.); bartoli@unicamp.br (J.R.B.)*

*+These authors contributed equally to this work.*

**Supporting Information**

Contents

[**Figure SI 1.** Lyophilized α-CDs (5 wt%) dispersed in a mixture comprised of chloroform and methanol (proportion of 2:1 (v/v)) observed under: **a**. daylight; **b**. UV light (λ = 365 nm). 2](#_Toc129612595)

[**Figure SI 2.** PMMA-NCNDs (5 wt%) solution (before casting) observed under: **a**. daylight; **b**. UV light (λ = 365 nm). 2](#_Toc129612596)

[**Figure SI 3.** PMMA-NCNDs (5 wt%) films on the Petri dishes after drop casting: **a**. frontal aspect, under daylight; **b**. side aspect, under daylight; **c**. frontal aspect, under UV light (λ = 365 nm); **d**. side aspect, under UV light (λ = 365 nm). 3](#_Toc129612597)

[**Figure SI 4. a**. Silicon solar cell; **b**. bench for photovoltaic measurements; **c**. PMMA-NCNDs (0.5 wt%) optical film positioned on the solar cell; **d**. Measurements of I × V curve and obtention of photovoltaic parameters with Lab Tracer 2.0 software. 4](#_Toc129612598)

[**Figure SI 5.** PMMA-α-CDs (5 wt%) solution (before casting) observed under: **a**. daylight; **b**. UV light (λ = 365 nm). 4](#_Toc129612599)

[**Figure SI 6.** Photoluminescence spectra obtained for PMMA-α-CDs (5 wt%) optical films when reducing the excitation and emission slits from 5 to 2.5 nm. The collected intensities considerably decreased, allowing the observation of the spectra with no saturation. 5](#_Toc129612600)

[**Figure SI 7.** Different optical films obtained when observed under: **a**. daylight; **b**. UV light (λ = 365 nm). 5](#_Toc129612601)

[**Figure SI 8.** Absorbances obtained for the different optical films. 6](#_Toc129612602)

[**Figure SI 9.** Transmittances obtained for the different optical films. 7](#_Toc129612603)


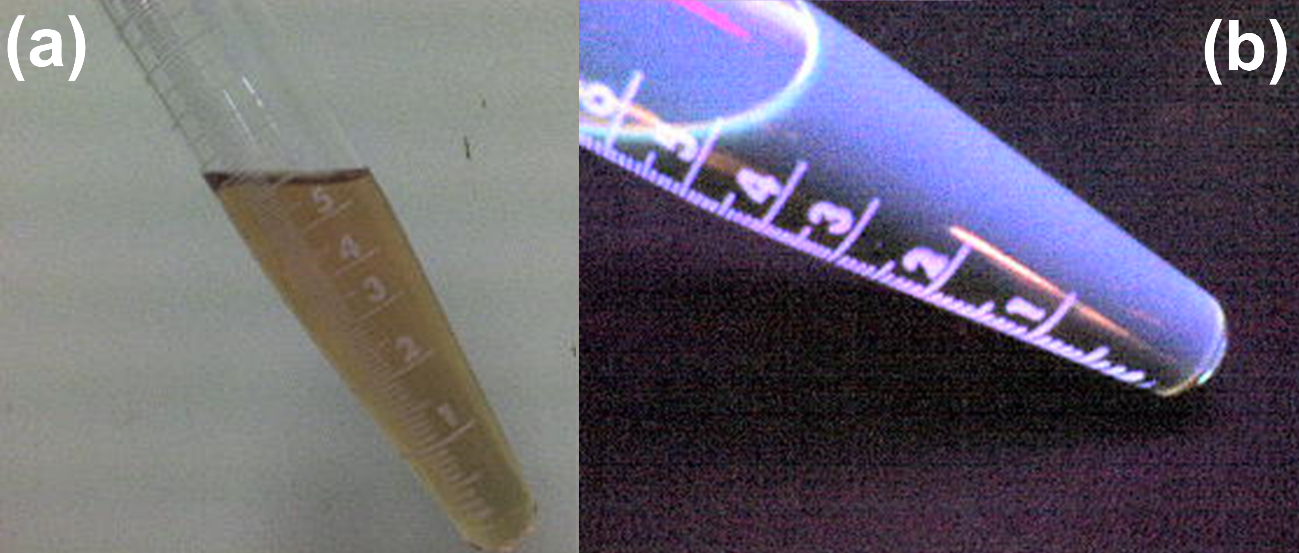


**Figure SI 1.** Lyophilized α-CDs (5 wt%) dispersed in a mixture comprised of chloroform and methanol (proportion of 2:1 (v/v)) observed under: **a**. daylight; **b**. UV light (λ = 365 nm).


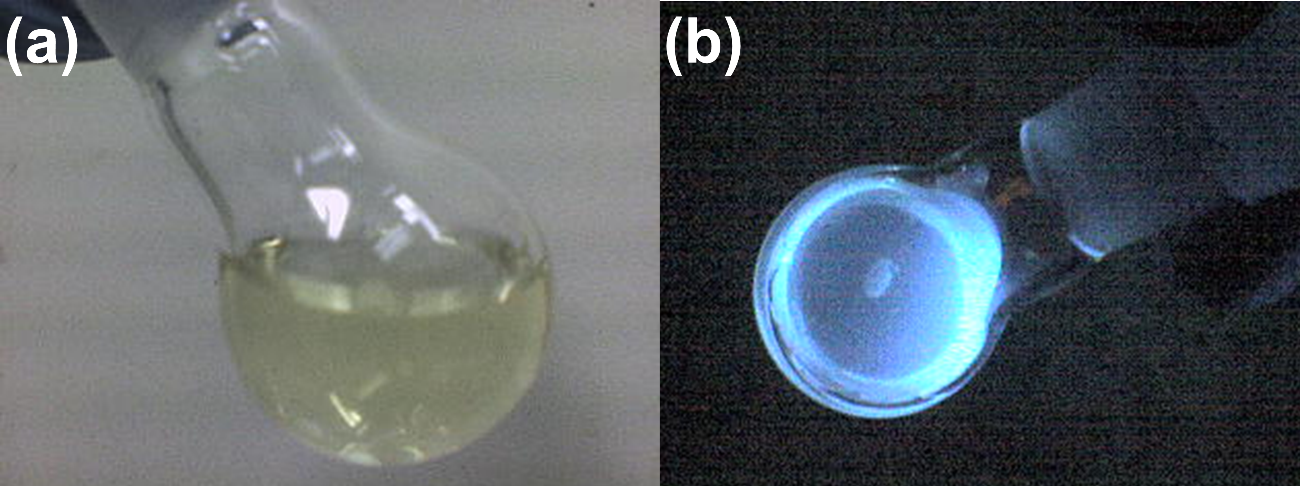


**Figure SI 2.** PMMA-NCNDs (5 wt%) solution (before casting) observed under: **a**. daylight; **b**. UV light (λ = 365 nm).


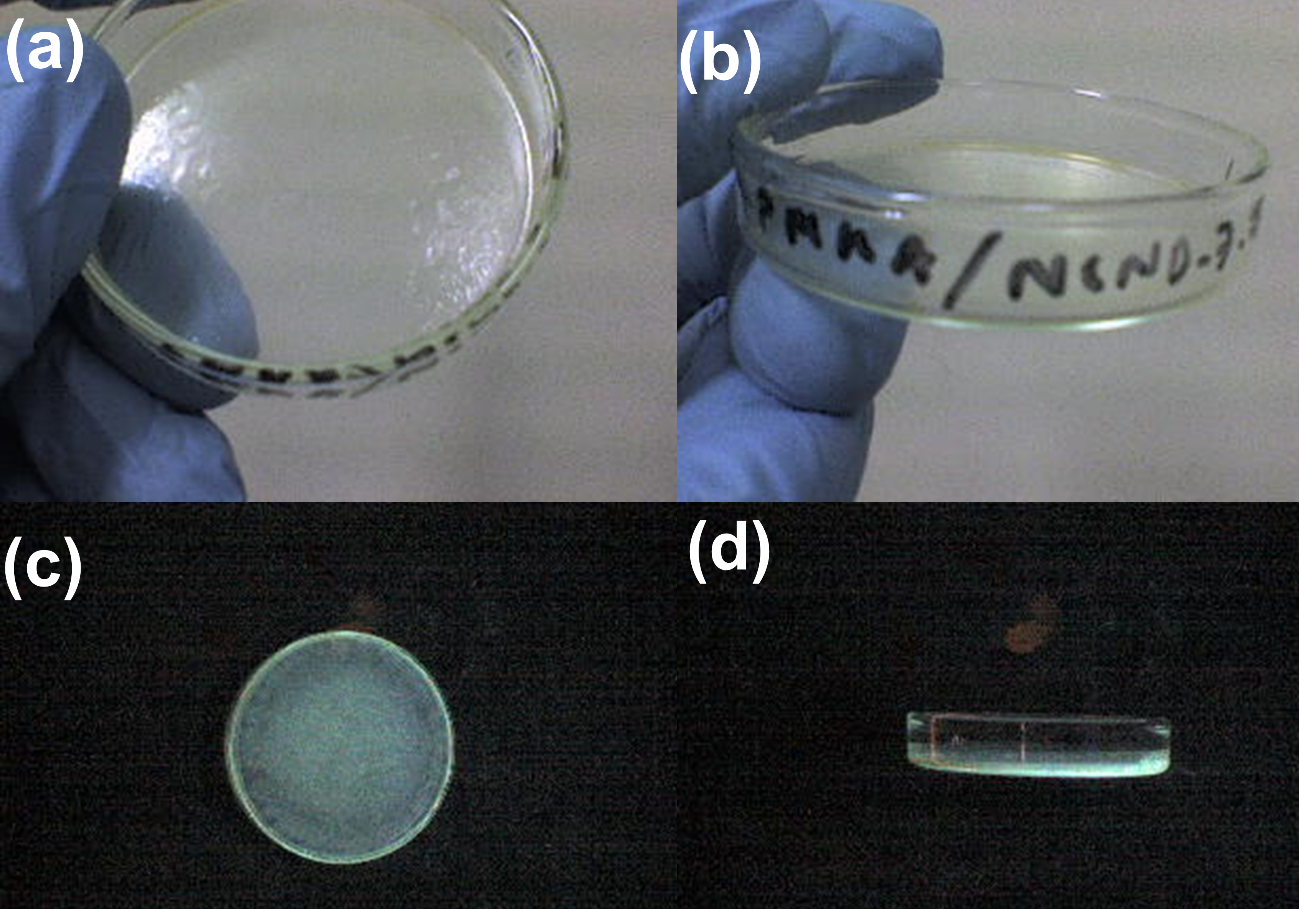


**Figure SI 3.** PMMA-NCNDs (5 wt%) films on the Petri dishes after drop casting: **a**. frontal aspect, under daylight; **b**. side aspect, under daylight; **c**. frontal aspect, under UV light (λ = 365 nm); **d**. side aspect, under UV light (λ = 365 nm).


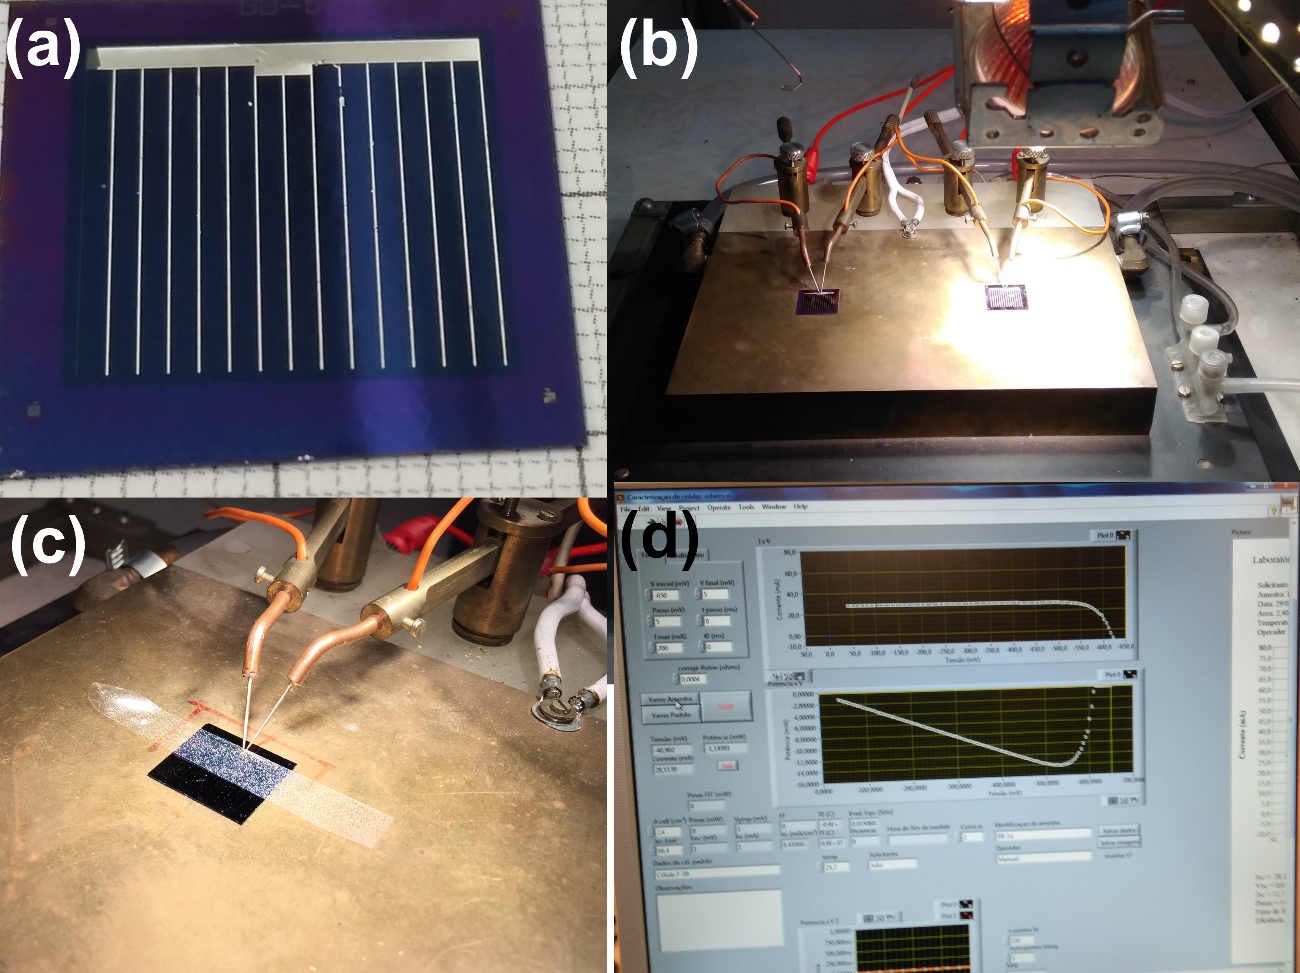


**Figure SI 4. a**. Silicon solar cell; **b**. bench for photovoltaic measurements; **c**. PMMA-NCNDs (0.5 wt%) optical film positioned on the solar cell; **d**. Measurements of I × V curve and obtention of photovoltaic parameters with Lab Tracer 2.0 software.


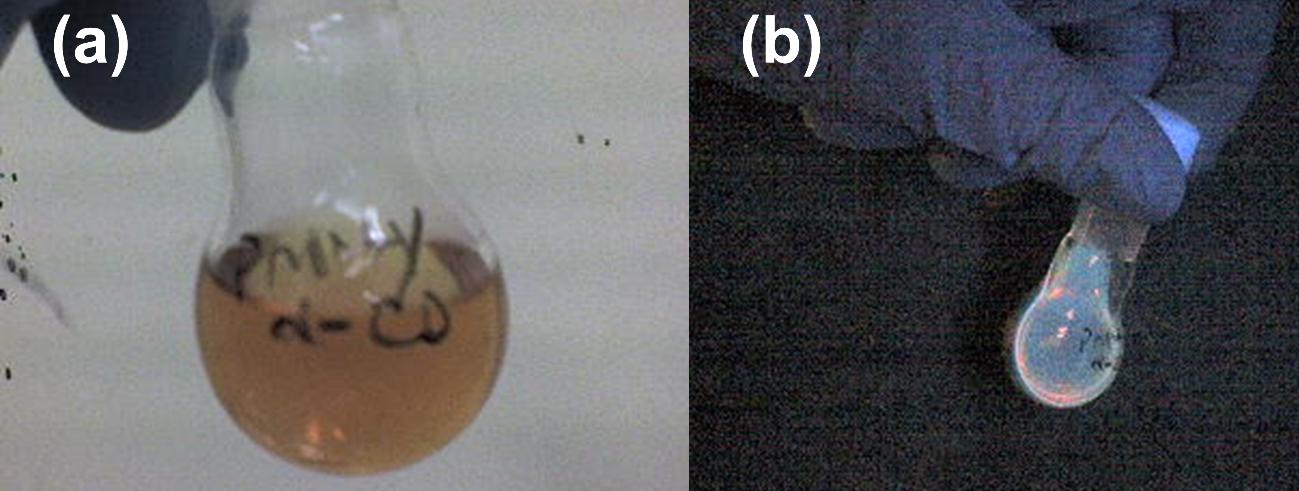


**Figure SI 5.** PMMA-α-CDs (5 wt%) solution (before casting) observed under: **a**. daylight; **b**. UV light (λ = 365 nm).


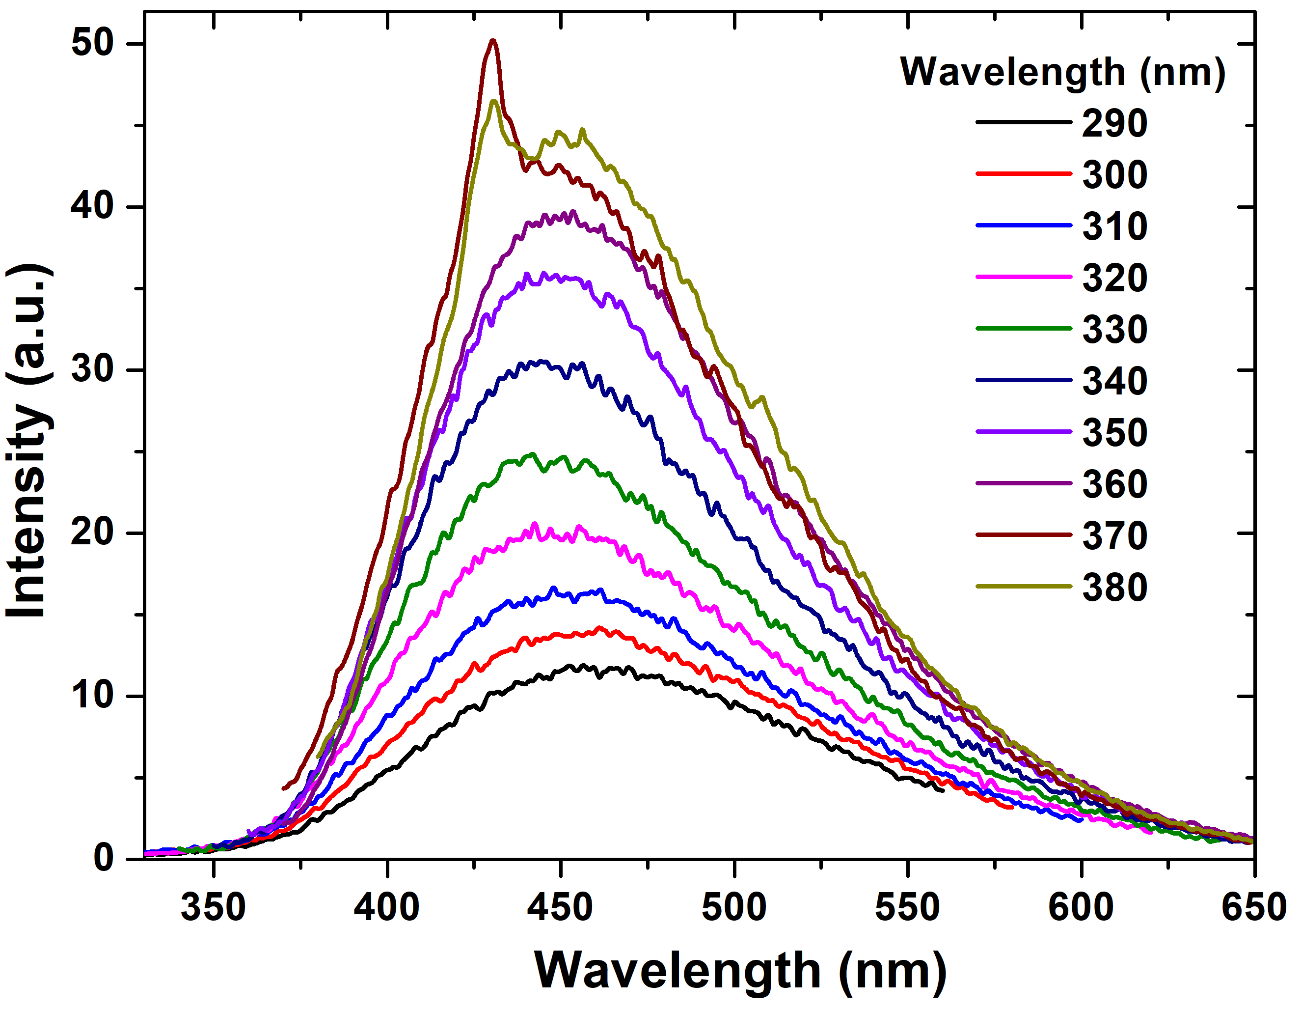


**Figure SI 6.** Photoluminescence spectra obtained for PMMA-α-CDs (5 wt%) optical films when reducing the excitation and emission slits from 5 to 2.5 nm. The collected intensities considerably decreased, allowing the observation of the spectra with no saturation.


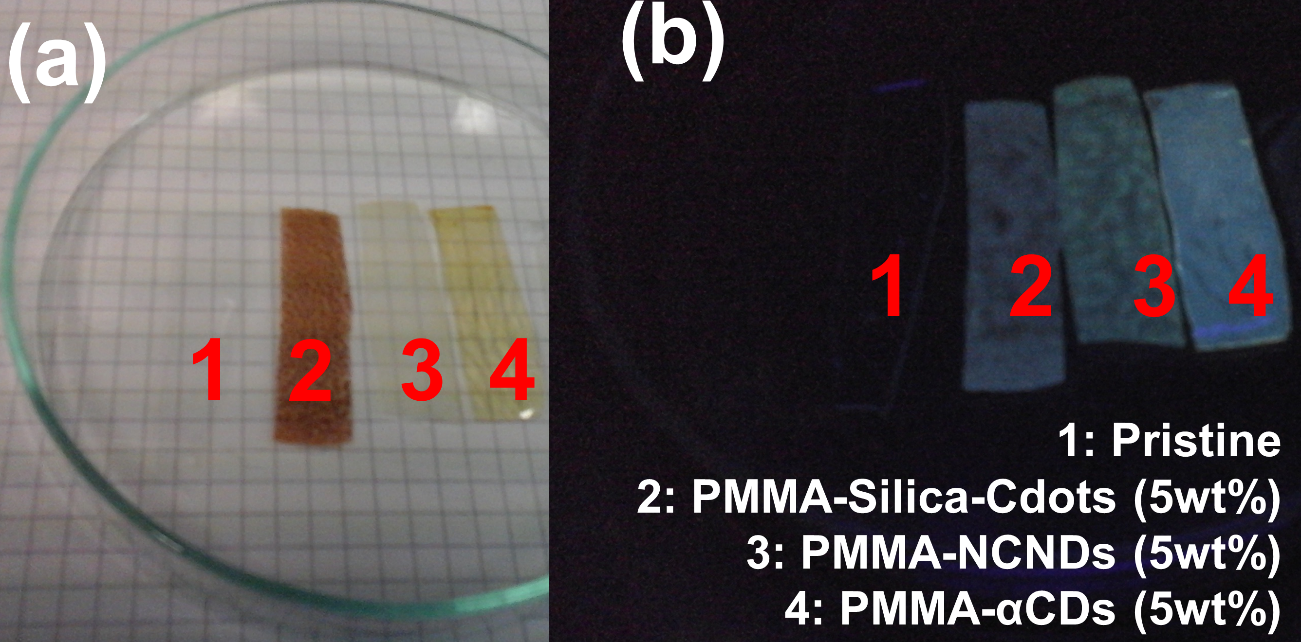


**Figure SI 7.** Different optical films obtained when observed under: **a**. daylight; **b**. UV light (λ = 365 nm).


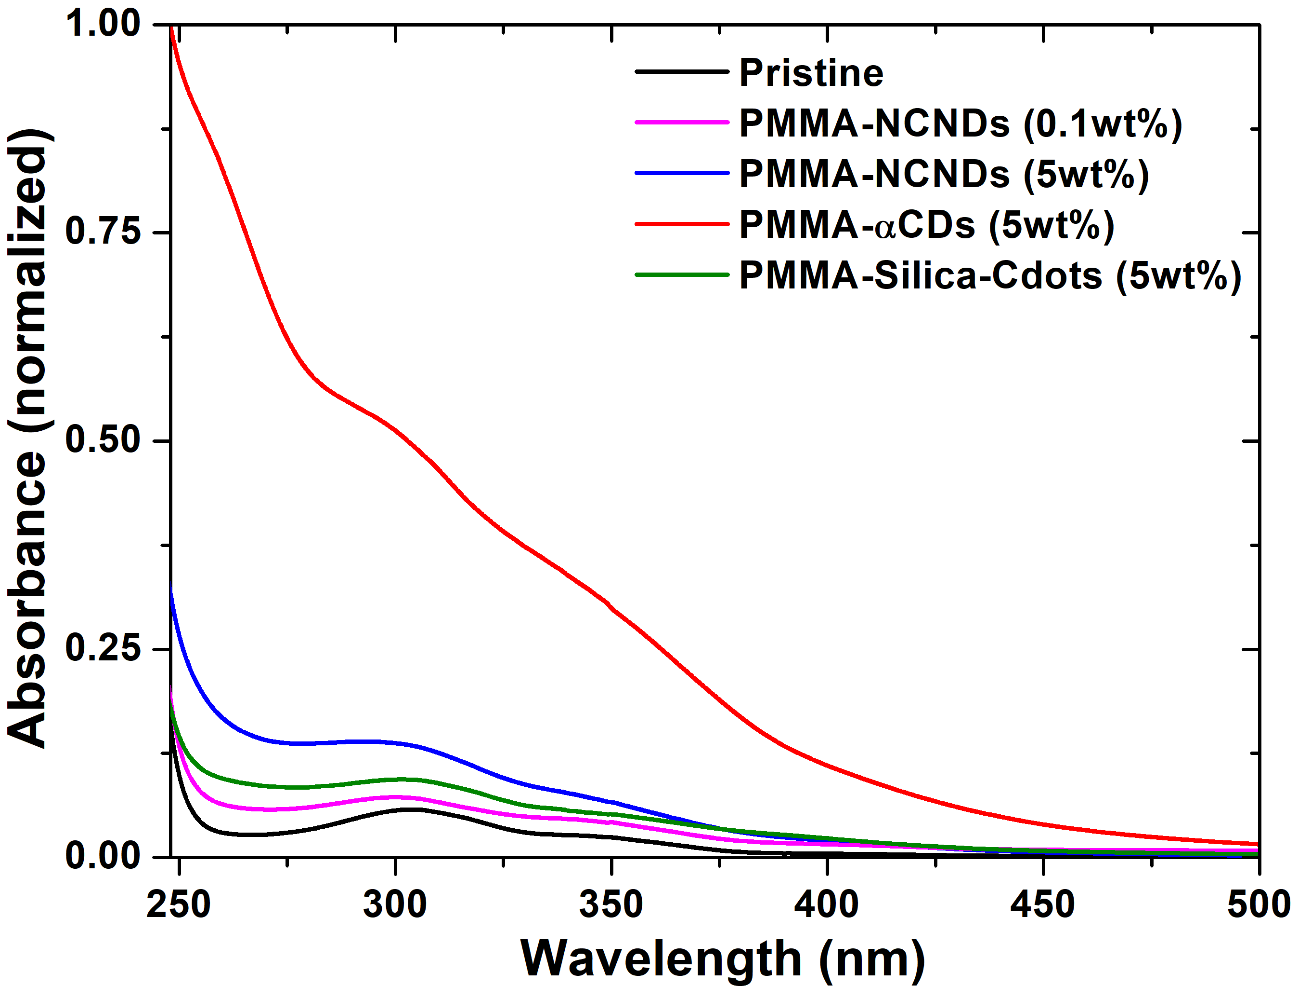


**Figure SI 8.** Absorbances obtained for the different optical films.


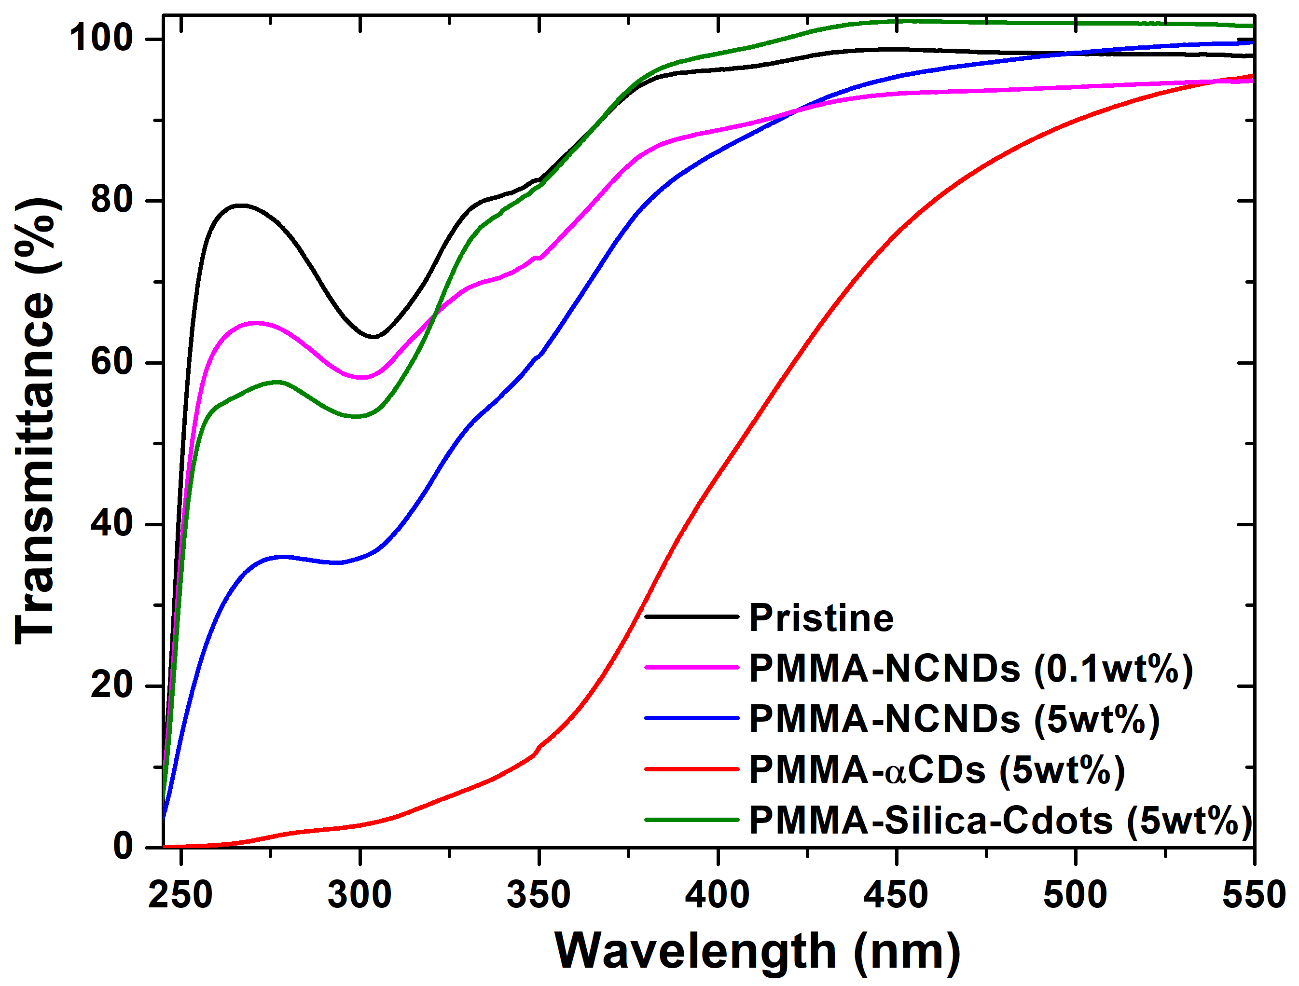


**Figure SI 9.** Transmittances obtained for the different optical films.
